# Supplementary material
Source: Springer Nature journal article supplement (https://www.springermedizin.de/resource/supplementary/12889_2010_2116_MOESM2_ESM.PDF/9484620)
Supplement: MOESM2 [file 9484620]

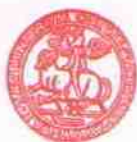

UNIVERSITÀ DEGLI STUDI DI TORINO  
DIPARTIMENTO DI SANITÀ PUBBLICA E DI MICROBIOLOGIA

2007 326 - TEND

The Ethical Committee of TEND by Night project, established as foreseen in the Annex 1 of the Agreement signed between Consepi S.p.a (on behalf of all project's partners) and the Public Health Executive Agency (acting under powers delegated by Commission of the European Communities) has approved the TEND by Night Study Protocol, after verification of its conformity to national regulations.

The Ethical Committee of TEND by Night project is composed by:

Roberta Siliquini – Italy (University of Turin)  
Francisco Alonso – Spain (University of Valencia)  
Axel Druart – Belgium and Netherland (Responsible Young Drivers)  
Andrzej Kalitowicz – Poland (Safe Driver Foundation)  
Lamberto Manzoli – Italy (University of Chieti)  
Daniel Vankov – Bulgaria (Open Youth)  
Anita Villerusa – Latvia (Riga Stradins University)

The President of the Ethical Committee

Prof. Roberta Siliquini  
  
UNIVERSITÀ DI TORINO  
Scuola di Specializzazione  
in Igiene e Medicina Preventiva  
Via Santena, 5 bis - 10126 TORINO  
Tel. 011.6705875 - Fax 011.670.5889  
IL DIRETTORE  
Prof.ssa ROBERTA SILIQUINI
